# Supplementary material for: Microbial Synthesis and Evaluation of Fungistatic Activity of 3-Butyl-3-hydroxyphthalide, the Mammalian Metabolite of 3-n-Butylidenephthalide
Source: Int J Mol Sci. 2021 Jul 15;22(14):7600. doi: 10.3390/ijms22147600 (PMC8304955; doi:10.3390/ijms22147600)
Supplement: Supplementary file 1 [file ijms-22-07600-s001.zip › ijms-1250316-supplementary.pdf]

# Microbial Synthesis and Evaluation of Fungistatic Activity of 3-Butyl-3-hydroxyphthalide, the Mammalian Metabolite of 3-*n*-Butylidenephthalide

Joanna Gach \*, Teresa Olejniczak \*, Piotr Krężel and Filip Boratyński

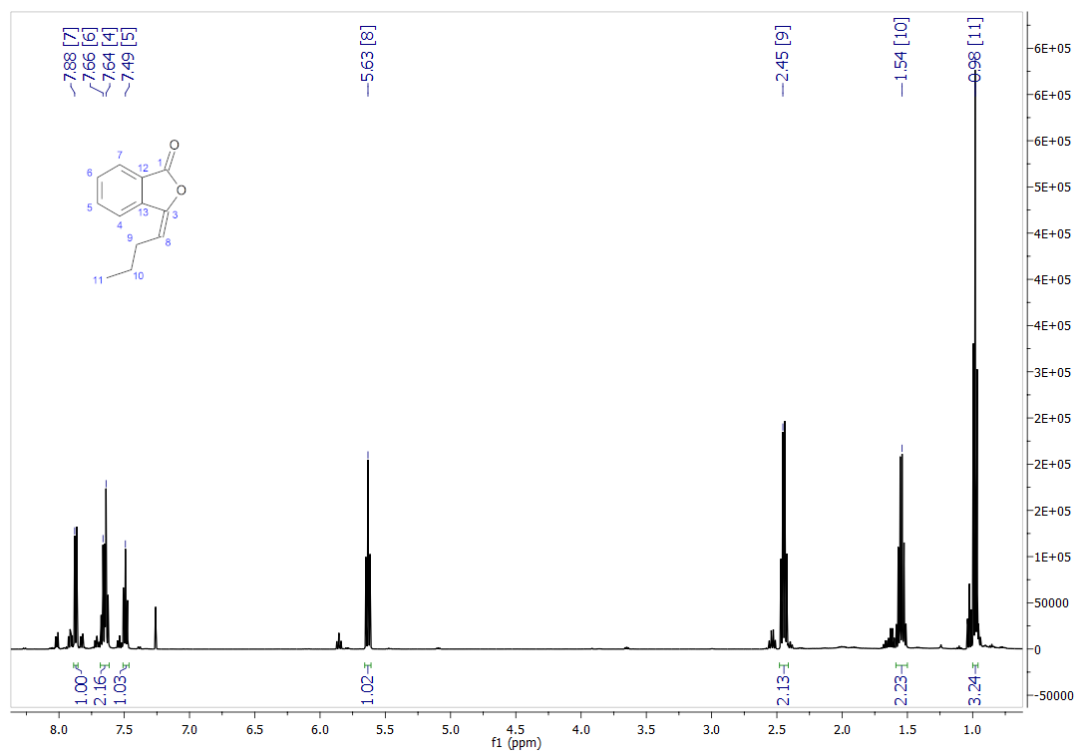

Figure S1. <sup>1</sup>H NMR spectrum of 3-*n*-butylidenephthalide (1).

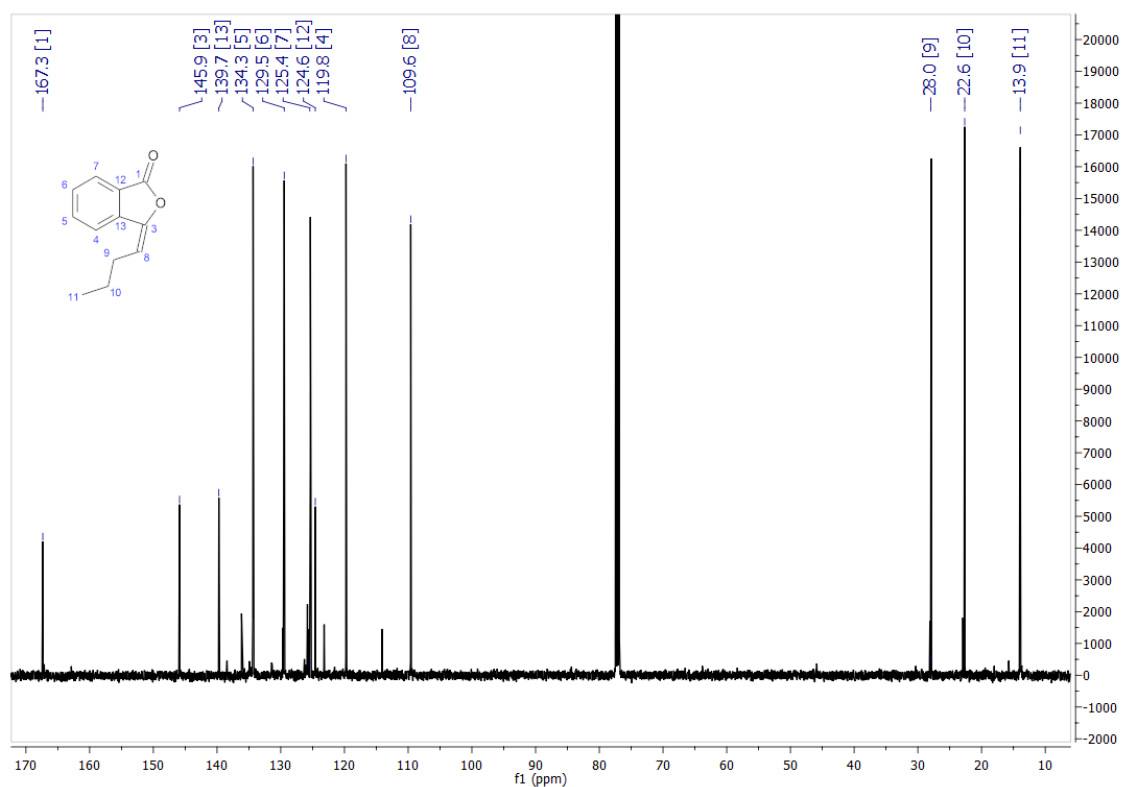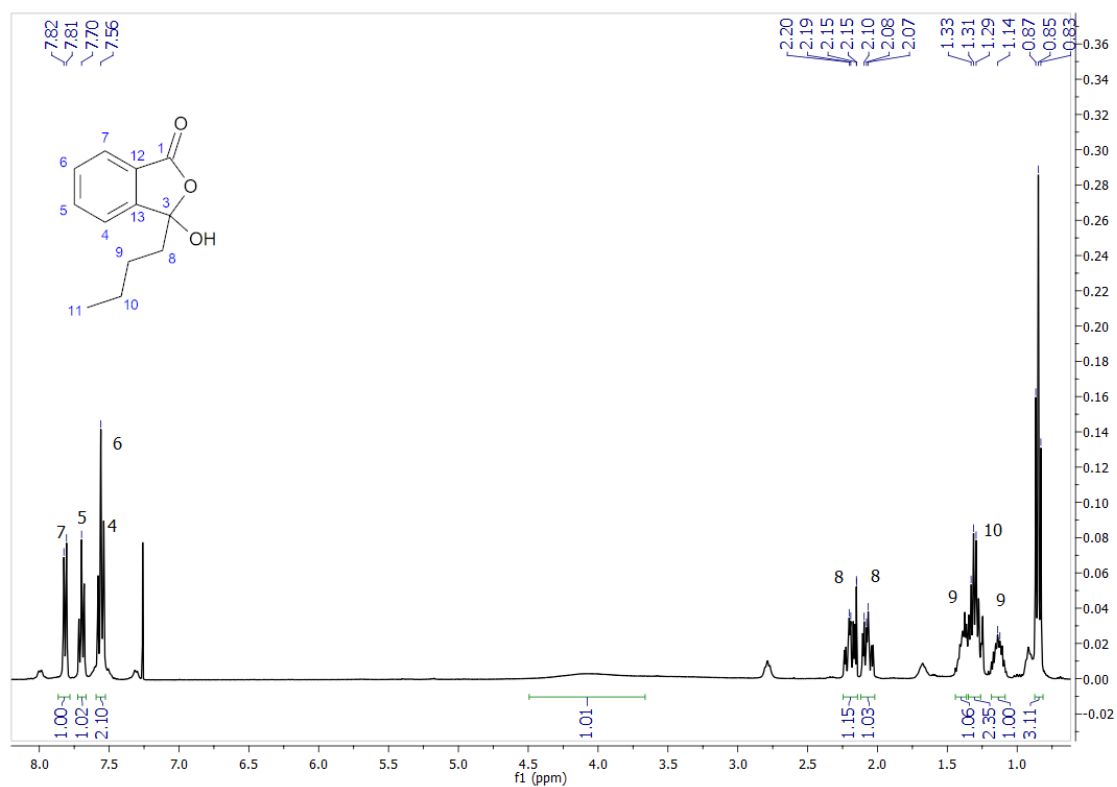

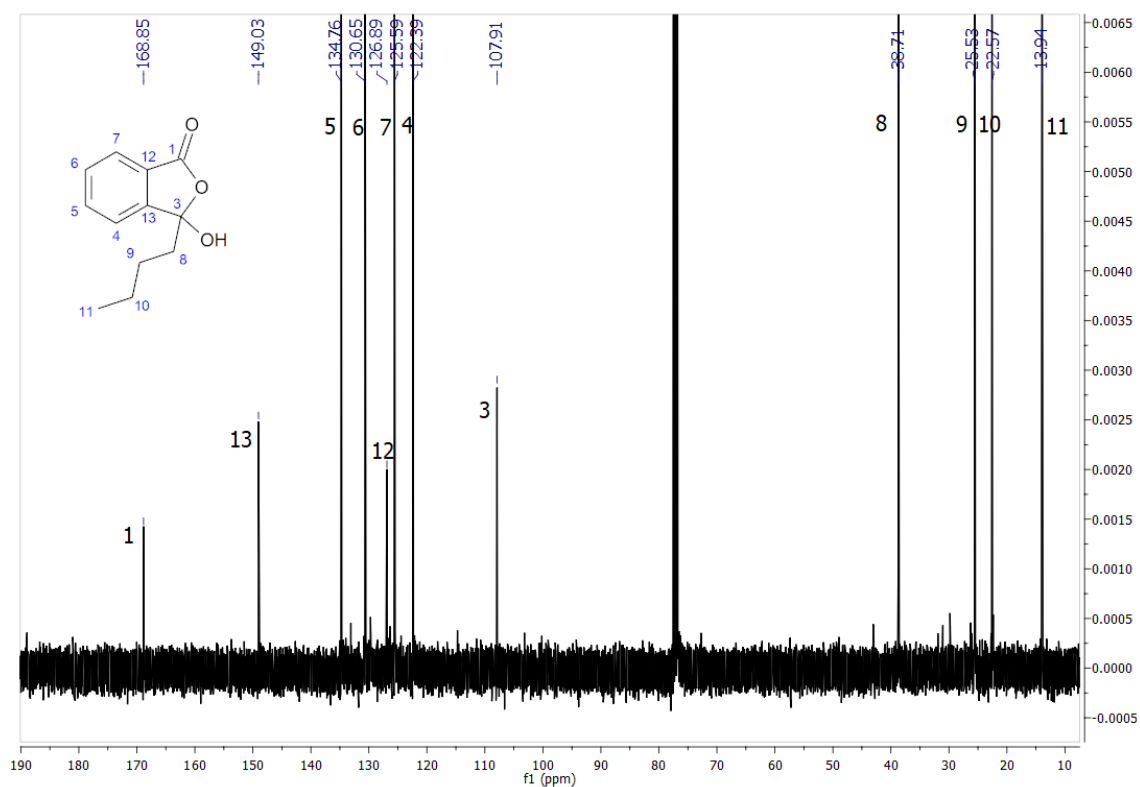

Figure S4.  $^{13}\text{C}$  NMR spectrum of 3-butyl-3-hydroxyphthalide (2).

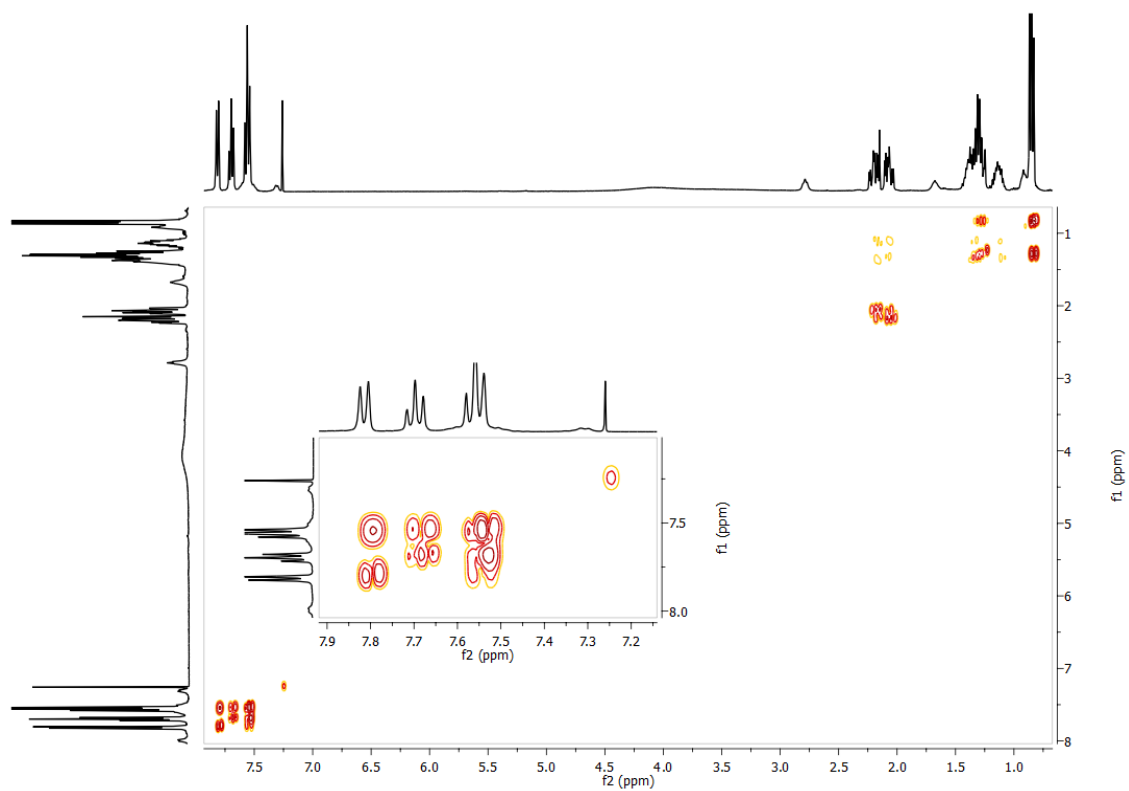

Figure S5. COSY spectrum of 3-butyl-3-hydroxyphthalide (2).

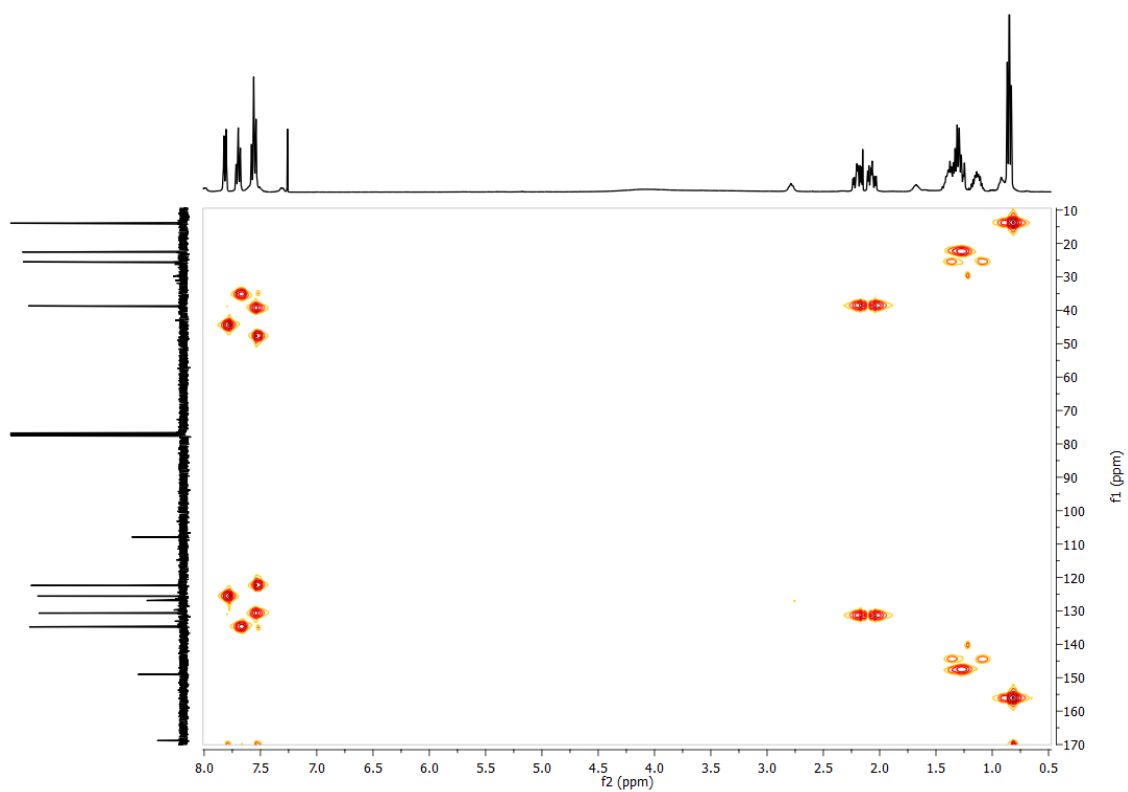

Figure S6. HSQC spectrum of 3-butyl-3-hydroxyphthalide (2).

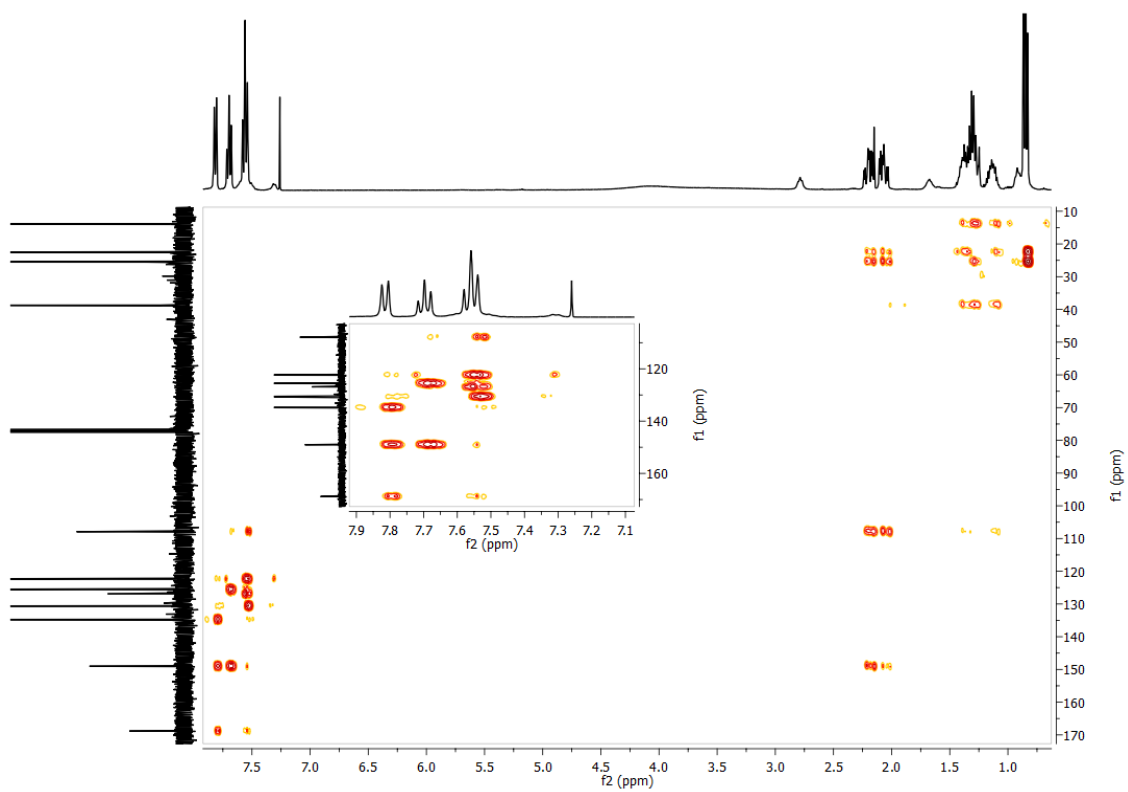

Figure S7. HMBC spectrum of 3-butyl-3-hydroxyphthalide (2).

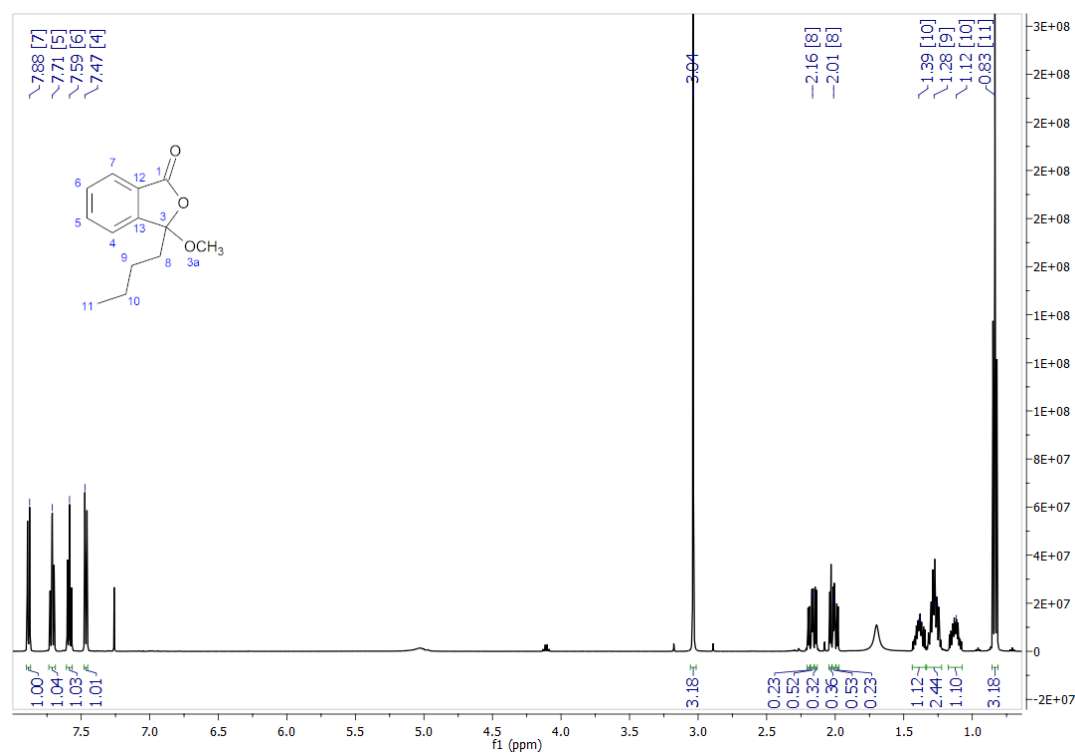

**Figure S8.** <sup>1</sup>H NMR spectrum of 3-butyl-3-methoxyphthalide (3).

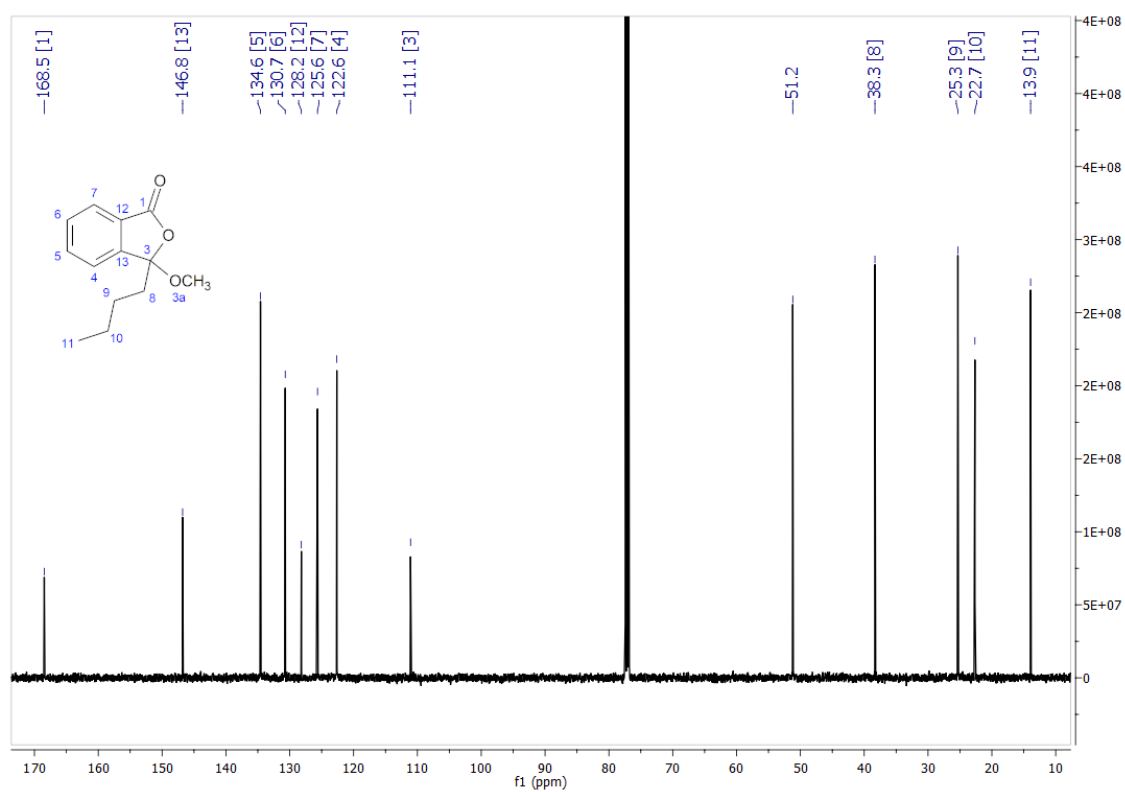

**Figure S9.** <sup>13</sup>C NMR spectrum of 3-butyl-3-methoxyphthalide (3).

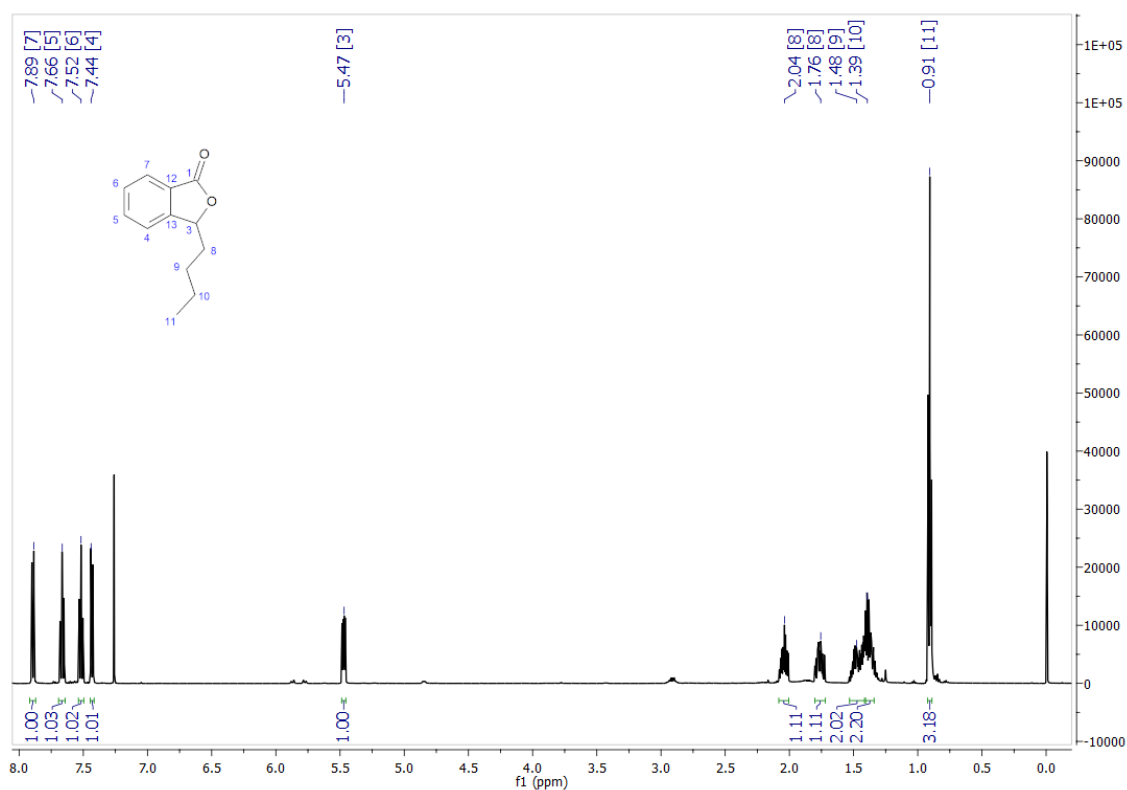

Figure S10. <sup>1</sup>H NMR spectrum of 3-*n*-butylphthalide (4).

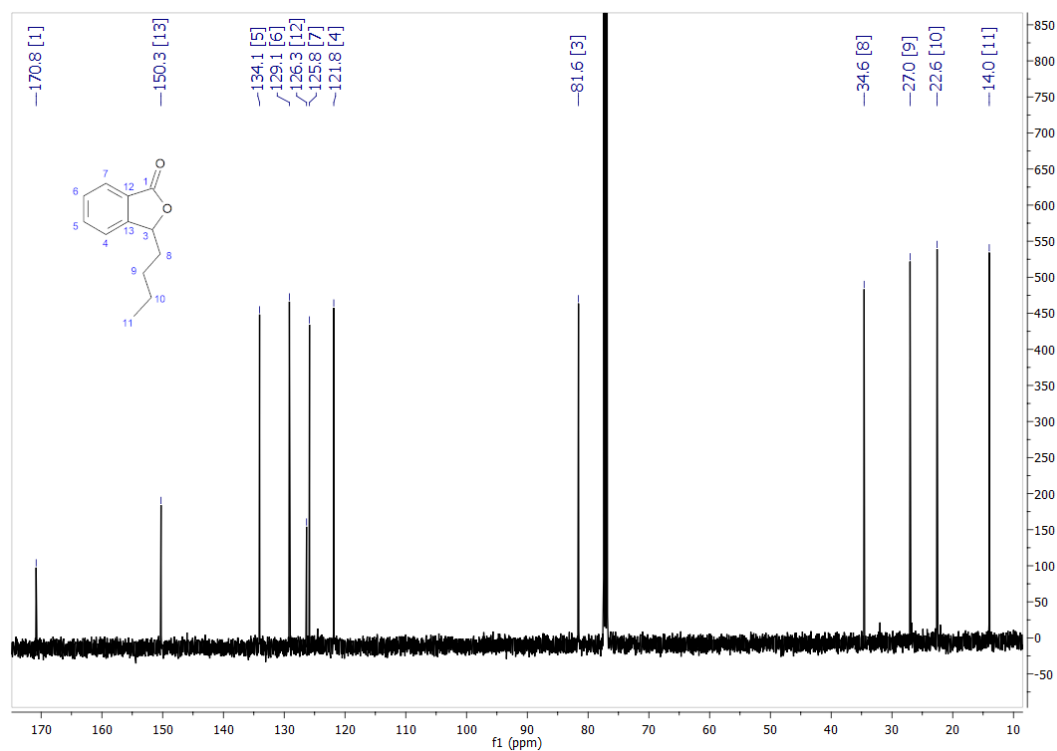

Figure S11. <sup>13</sup>C NMR spectrum of 3-*n*-butylphthalide (4).

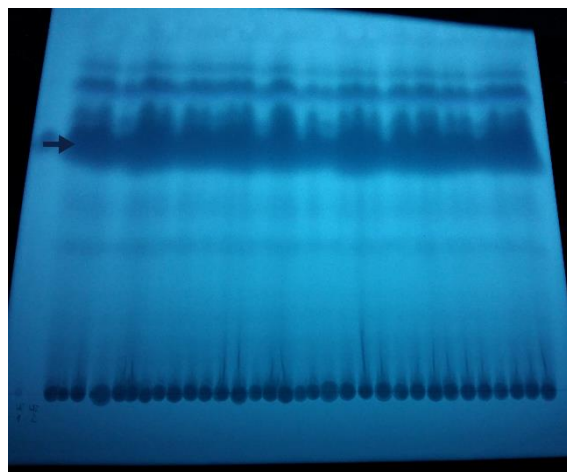

**Figure S12.** Purification of the product formed during biotransformation on reversed-phase thin layer chromatography plate. The product is indicated by an arrow.

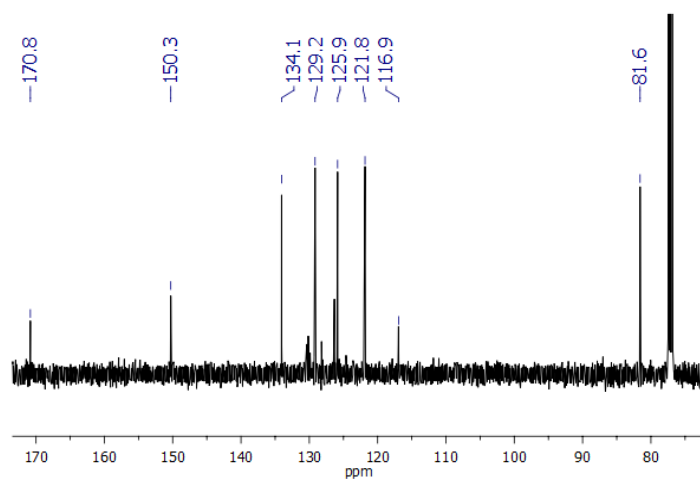

**Figure S13.** Fragment of the  $^{13}\text{C}$  NMR spectrum of the *Chaetomium indicum* AM 158 biotransformation mixture.

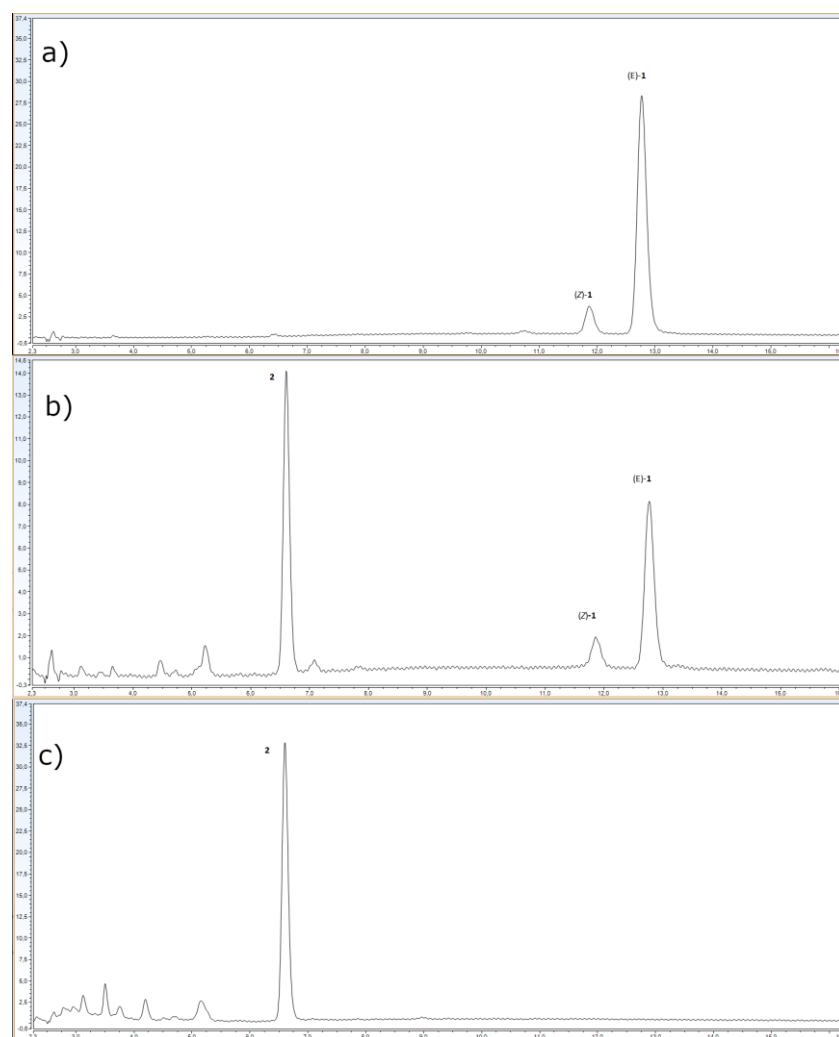

**Figure S14.** Chromatograms of 3-*n*-butylidenephthalide (1) – (*Z*) and (*E*) isomers (a) and the biotransformation mixtures of *Aspergillus candidus* AM 386 on days 2 (b) and 14 of the process (c).

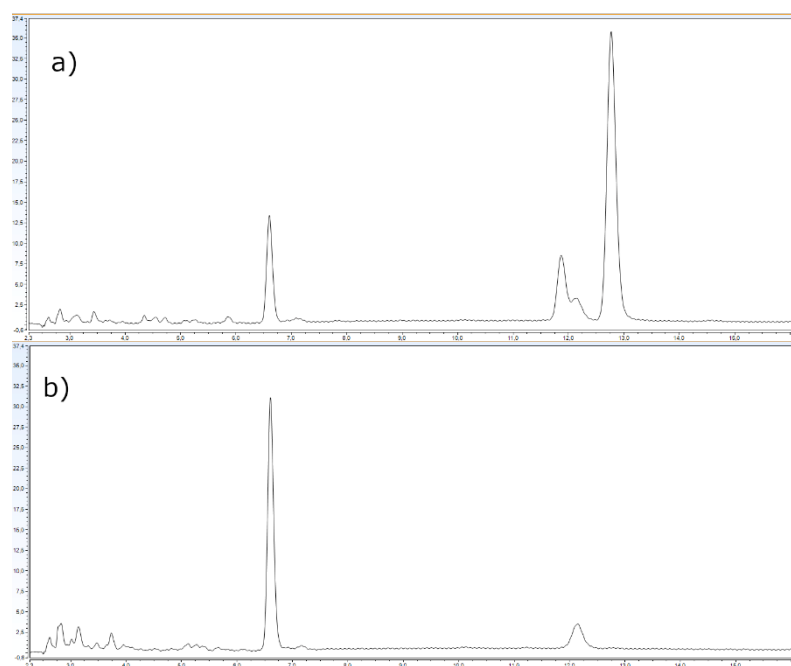

**Figure S15.** Chromatograms of the biotransformation mixtures of *Chaetomium indicum* AM 158 on days 2 (a) and 14 of the process (b).

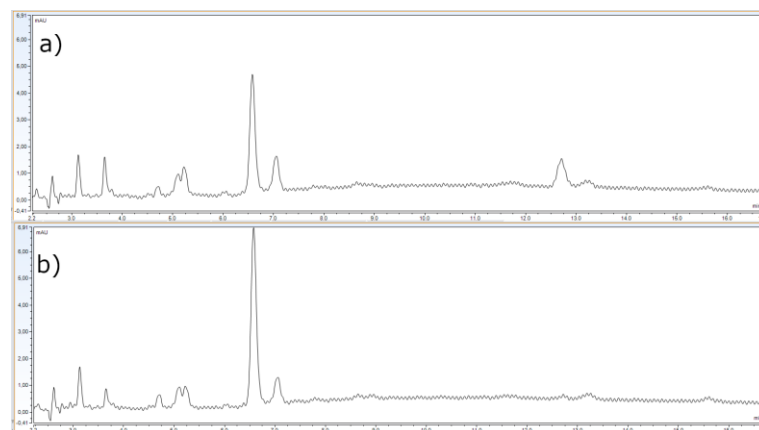

**Figure S16.** Chromatograms of the biotransformation mixtures of *Absidia cylindrospora* AM 336 on days 2 (a) and 14 of the process (b).
